# Supplementary material for: (-)-SCR1693 Protects against Memory Impairment and Hippocampal Damage in a Chronic Cerebral Hypoperfusion Rat Model
Source: PubMed Central journal article supplement (PMC4924100; doi:10.1038/srep28908), 2016-06-28

# **(-)-SCR1693 Protects against Memory Impairment and Hippocampal Damage in a Chronic Cerebral Hypoperfusion Rat Model**

Xiaoyin Zhu<sup>a,1,2</sup>, Jingwei Tian<sup>2</sup>, Songmei Sun<sup>2</sup>, Dong Qiuju<sup>2</sup>, Zhang Fangxi<sup>2</sup>, Xiumei Zhang<sup>b,1</sup> \*

<sup>1</sup> Department of Pharmacology, Shandong Univeristy School of Medicine 44#,  
Wenhua Xi Road, Jinan, Shandong, 250012 P.R. China

<sup>2</sup> Key Laboratory of Molecular Pharmacology and Drug Evaluation (Ministry of  
Education of China), School of Pharmacy, Yantai University, Yantai, China.

<sup>a</sup>E-mail: zhuxiaoyin@luye.cn

<sup>b</sup>E-mail: zxy\_sptenic@163.com

### p-Akt

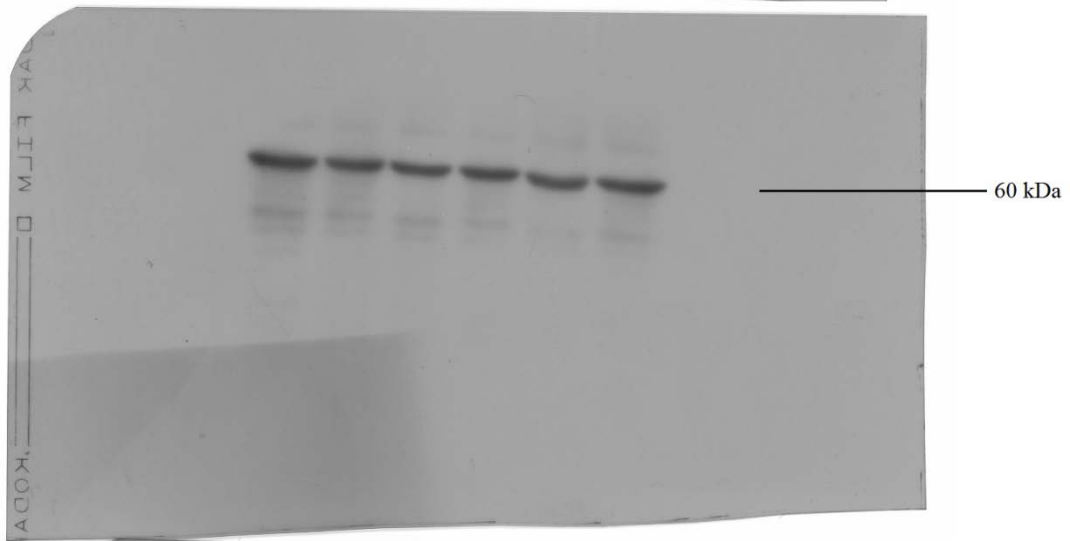

sham model donepezil 0.3 1 3  
1 mg/kg (-)-SCR1693 (mg/kg)

### Akt

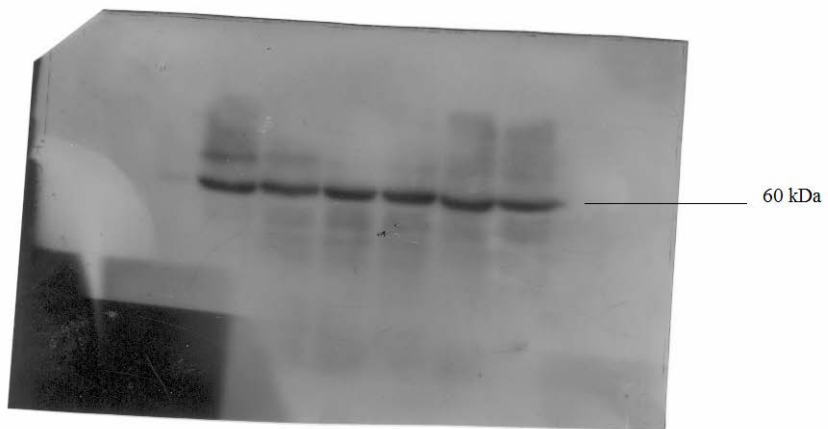

sham model donepezil 0.3 1 3  
1 mg/kg (-)-SCR1693(mg/kg)

### p-GSK-3 $\beta$

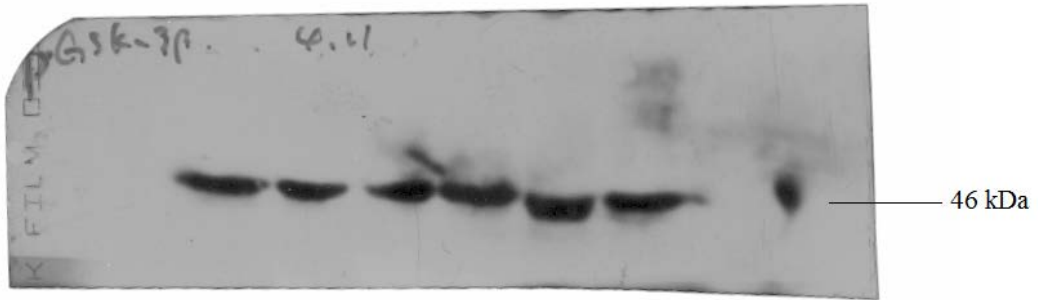

sham model donepezil 0.3 1 3  
1mg/kg (-)-SCR1693(mg/kg)

### GSK-3 $\beta$

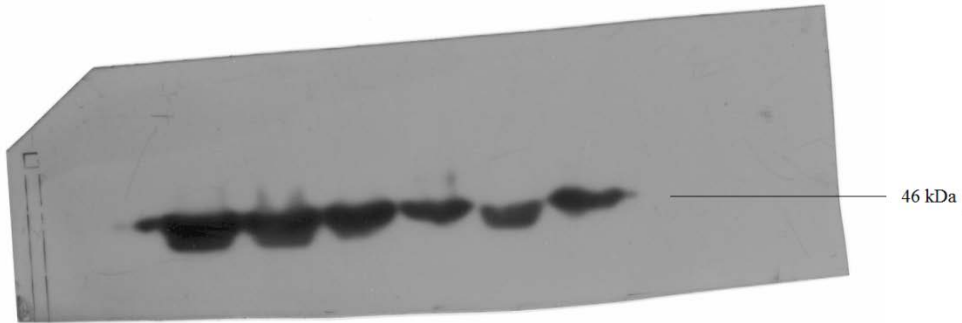

sham model donepezil 0.3 1 3  
1 mg/kg (-)-SCR1693(mg/kg)

**p-tau**

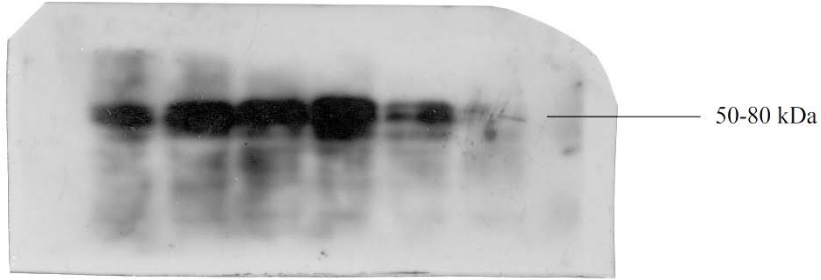

sham model donepezil 0.3 1 3  
1 mg/kg (-)-SCR1693(mg/kg)

**tau**

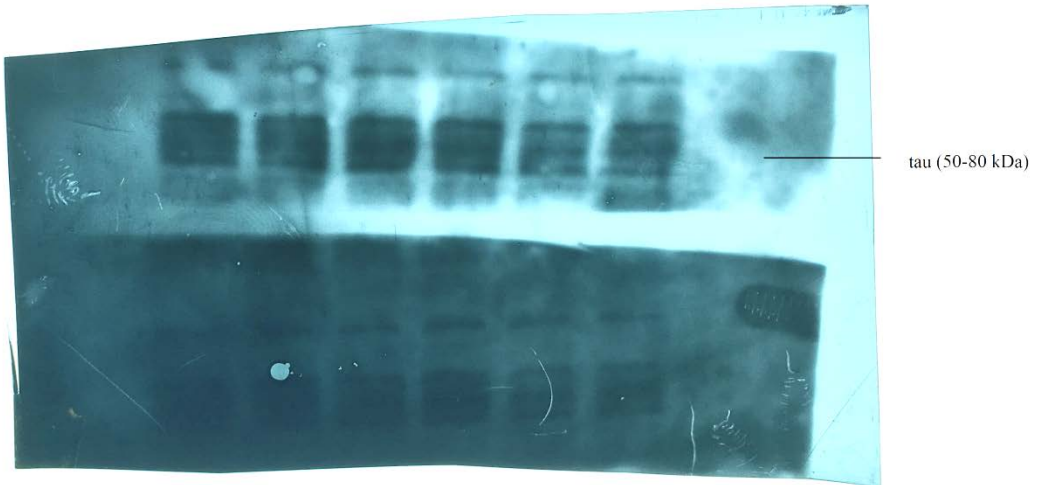

sham model donepezil 0.3 1 3  
1 mg/kg (-)-SCR1693 (mg/kg)

**$\beta$ -actin**

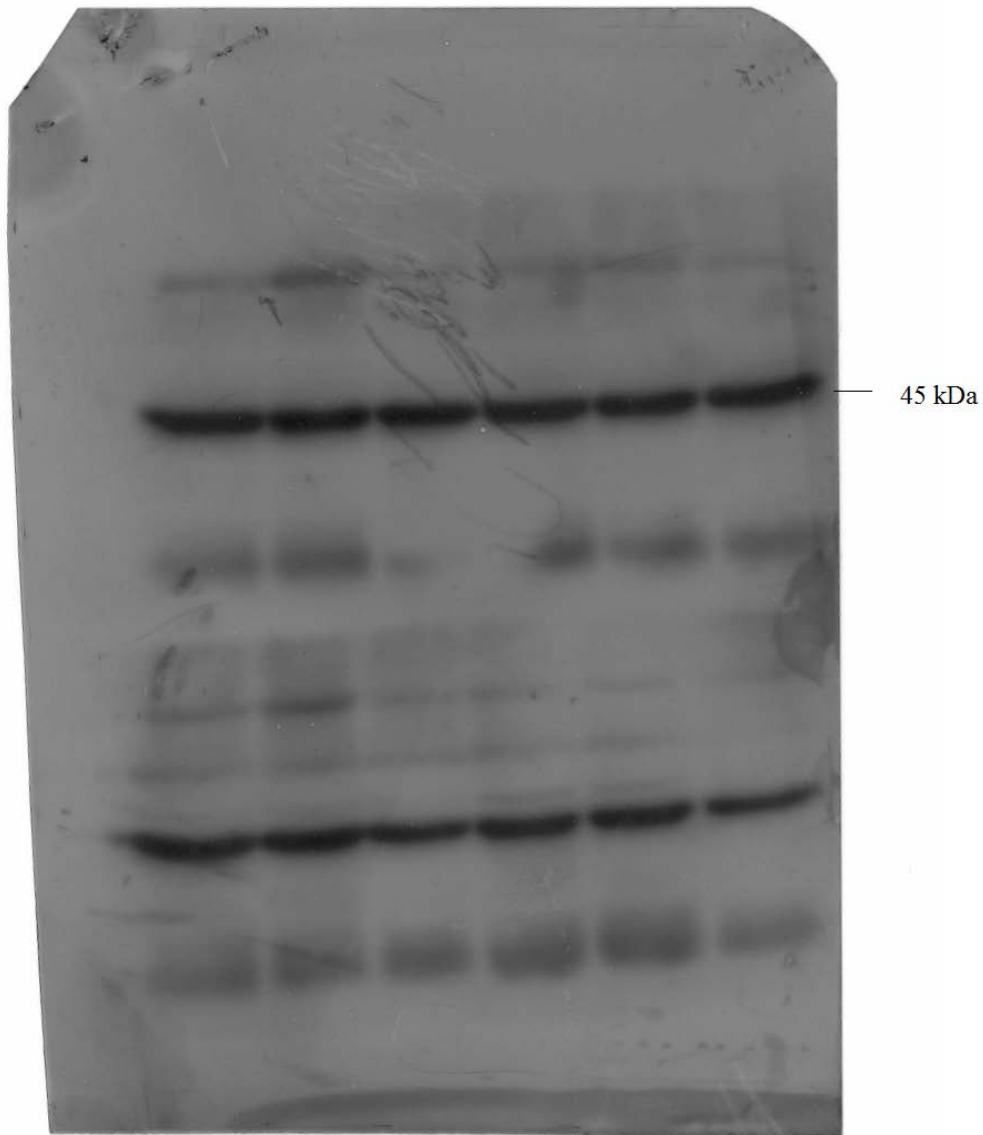

|      |       |                      |                            |                          |                          |
|------|-------|----------------------|----------------------------|--------------------------|--------------------------|
| sham | model | donepezil<br>1 mg/kg | 0.3<br>(-)-SCR1693 (mg/kg) | 1<br>(-)-SCR1693 (mg/kg) | 3<br>(-)-SCR1693 (mg/kg) |
|------|-------|----------------------|----------------------------|--------------------------|--------------------------|

## Tau

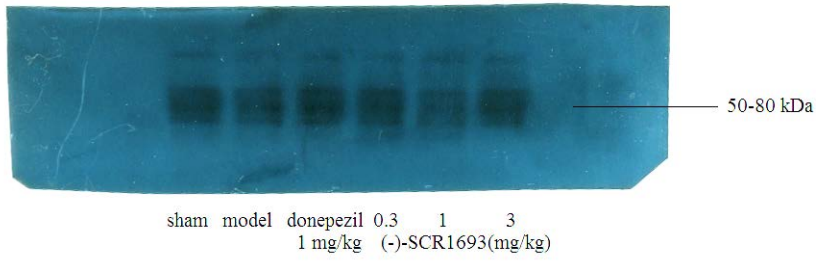

## Presenilin 1

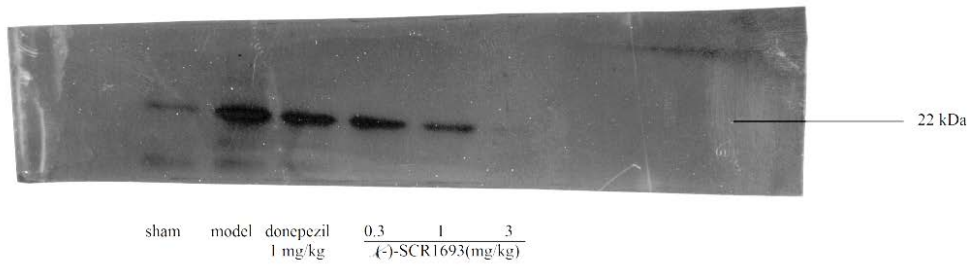

Supplement: srep28908-s1.pdf [file srep28908-s1.pdf]
